# Supplementary material
Source: HighWire-hosted journal article supplement (https://ijgc.bmj.com/content/30/6/845)

**A.**

|                                     | HR   | 95% CI     | p-value  |
|-------------------------------------|------|------------|----------|
| Age                                 | 1.01 | 1.01, 1.02 | < 2e-16  |
| Charlson Co-Morbidity Index         | 1.12 | 1.06, 1.19 | 7.06E-05 |
| Year of Diagnosis                   | 0.97 | 0.95, 0.98 | 5.99E-05 |
| Grade (High)                        | 1.58 | 1.13, 2.22 | 8.09E-03 |
| Histologic Type (Mucinous)          | 1.69 | 1.22, 2.35 | 1.82E-03 |
| Stage (IV)                          | 1.24 | 1.16, 1.32 | 3.54E-10 |
| Residual Disease (R1)               | 1.46 | 1.37, 1.56 | < 2e-16  |
| Sequence of Treatment (Neoadjuvant) | 1.36 | 1.27, 1.45 | < 2e-16  |

**B.**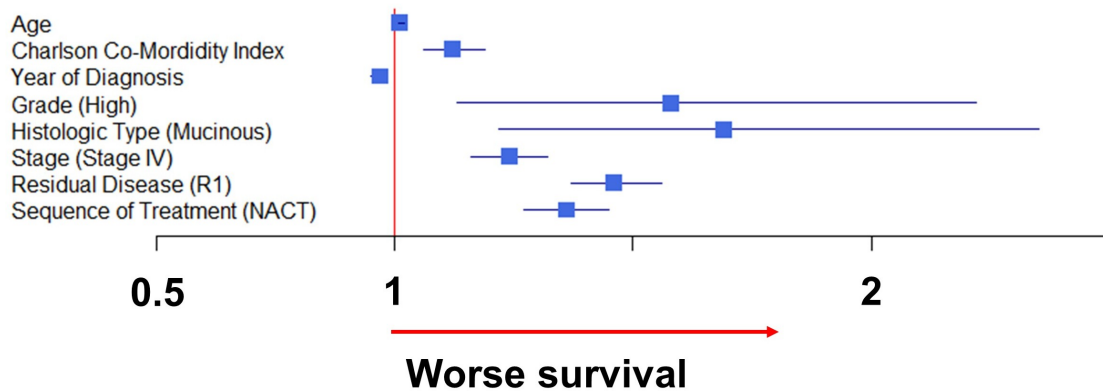

Supplement: inline-supplementary-material-2 [file inline-supplementary-material-2.pdf]
